# Supplementary material for: Nanoflower-like P-doped Nickel Oxide as a Catalytic Counter Electrode for Dye-Sensitized Solar Cells
Source: MDPI journal article supplement (doi:10.3390/nano12224036), 2022-11-17
Supplement: s1 [file s1]

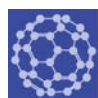

# Nanoflower-Like P-Doped Nickel Oxide as a Catalytic Counter Electrode for Dye-Sensitized Solar Cells

Yi-Lin Chen <sup>1</sup>, Yi-June Huang <sup>1</sup>, Min-Hsin Yeh <sup>2,\*</sup>, Miao-Syuan Fan <sup>1</sup>, Cheng-Tai Lin <sup>1</sup>, Ching-Cheng Chang <sup>2</sup>, Vittal Ramamurthy <sup>1</sup> and Kuo-Chuan Ho <sup>1,3,\*</sup>

<sup>1</sup> Department of Chemical Engineering, National Taiwan University, Taipei 10617, Taiwan

<sup>2</sup> Department of Chemical Engineering, National Taiwan University of Science and Technology, Taipei 10607, Taiwan

<sup>3</sup> Institute of Polymer Science and Engineering, National Taiwan University, Taipei 10617, Taiwan

\* Correspondence: mhyeh@mail.ntust.edu.tw (M.-H.Y.); kcho@ntu.edu.tw (K.-C.H.);  
Tel.: +886-2-2737-6643 (M.-H.Y.); +886-2-3366-3020 (K.-C.H.); Fax: +886-2-2737-6644 (M.-H.Y.);  
+886-2-2362-3040 (K.-C.H.)

**Table S1.** Photovoltaic parameters of the DSSCs with P-NiO-0.5, NiO, and Pt CEs, measured at 100 mW cm<sup>-2</sup> (AM1.5G) in rear illumination. The standard deviation for each data is based on three cells.

| CEs       | $\eta$ (%)  | $V_{oc}$ (V) | $J_{sc}$ (mA cm <sup>-2</sup> ) | FF          |
|-----------|-------------|--------------|---------------------------------|-------------|
| P-NiO-0.5 | 5.45 ± 0.03 | 0.76 ± 0.03  | 10.15 ± 0.07                    | 0.71 ± 0.00 |
| NiO       | 0.16 ± 0.00 | 0.73 ± 0.06  | 3.18 ± 0.02                     | 0.07 ± 0.00 |
| Pt        | 4.99 ± 0.02 | 0.76 ± 0.02  | 9.25 ± 0.01                     | 0.71 ± 0.00 |

**Table S2.** Photovoltaic parameters of the DSSC with P-NiO-0.5 CE, obtained at different light conditions. The standard deviation for each data is based on three cells.

| Light Intensity (mW cm <sup>-2</sup> ) | $\eta$ (%)  | $V_{oc}$ (V) | $J_{sc}$ (mA cm <sup>-2</sup> ) | FF          |
|----------------------------------------|-------------|--------------|---------------------------------|-------------|
| 100 (1 Sun)                            | 9.05 ± 0.04 | 0.79 ± 0.00  | 16.96 ± 0.01                    | 0.68 ± 0.00 |
| 80 (0.8 Sun)                           | 8.97 ± 0.01 | 0.78 ± 0.01  | 13.13 ± 0.01                    | 0.70 ± 0.00 |
| 60 (0.6 Sun)                           | 8.75 ± 0.02 | 0.76 ± 0.00  | 9.40 ± 0.01                     | 0.73 ± 0.01 |
| 40 (0.4 Sun)                           | 8.21 ± 0.01 | 0.75 ± 0.00  | 5.87 ± 0.08                     | 0.75 ± 0.00 |
| 20 (0.2 Sun)                           | 7.87 ± 0.00 | 0.73 ± 0.02  | 2.86 ± 0.01                     | 0.75 ± 0.00 |

**Table S3.** Photovoltaic parameters of the DSSCs with Pt CE obtained at different light conditions. The standard deviation for each data is based on three cells.

| Light intensity<br>(mW cm <sup>-2</sup> ) | $\eta$ (%)  | $V_{oc}$ (V) | $J_{sc}$ (mA cm <sup>-2</sup> ) | $FF$        |
|-------------------------------------------|-------------|--------------|---------------------------------|-------------|
| 100 (1 Sun)                               | 8.51 ± 0.00 | 0.79 ± 0.00  | 16.17 ± 0.01                    | 0.67 ± 0.00 |
| 80 (0.8 Sun)                              | 8.47 ± 0.01 | 0.77 ± 0.01  | 12.41 ± 0.01                    | 0.70 ± 0.00 |
| 60 (0.6 Sun)                              | 8.16 ± 0.00 | 0.76 ± 0.00  | 9.01 ± 0.03                     | 0.71 ± 0.00 |
| 40 (0.4 Sun)                              | 7.51 ± 0.01 | 0.75 ± 0.00  | 5.61 ± 0.04                     | 0.72 ± 0.01 |
| 20 (0.2 Sun)                              | 6.17 ± 0.05 | 0.71 ± 0.00  | 2.66 ± 0.03                     | 0.65 ± 0.00 |

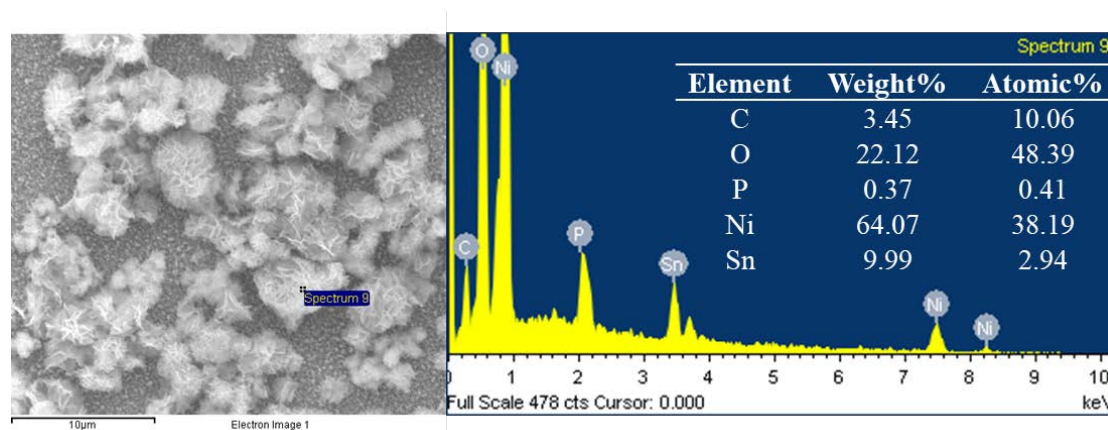

**Figure S1.** EDAX analysis of the P-NiO film.

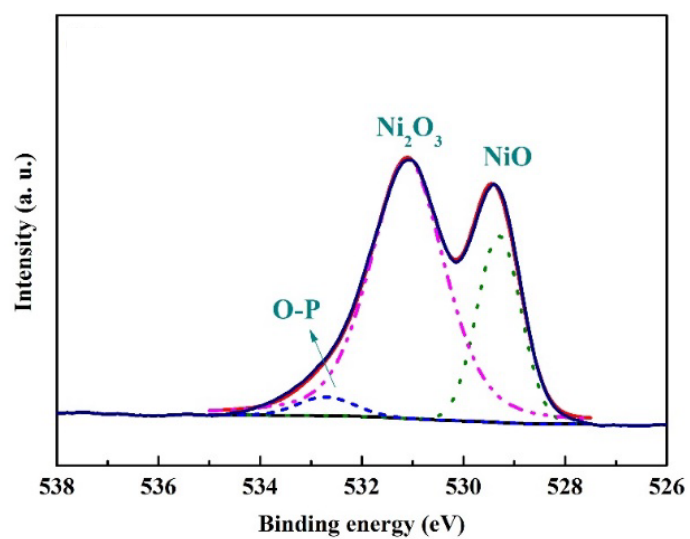

Figure S2. XPS spectra of the P-NiO in O 1s region.

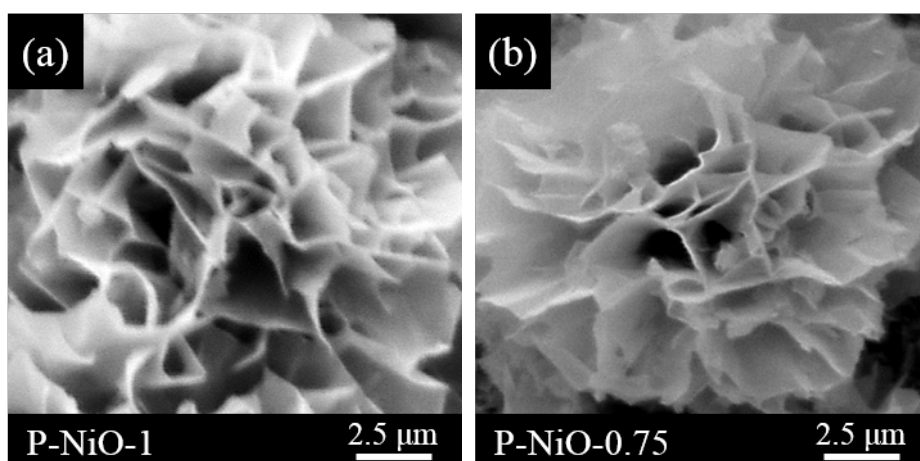

Figure S3. FE-SEM images of (a) P-NiO-1 and (b) P-NiO-0.75 before annealing process.

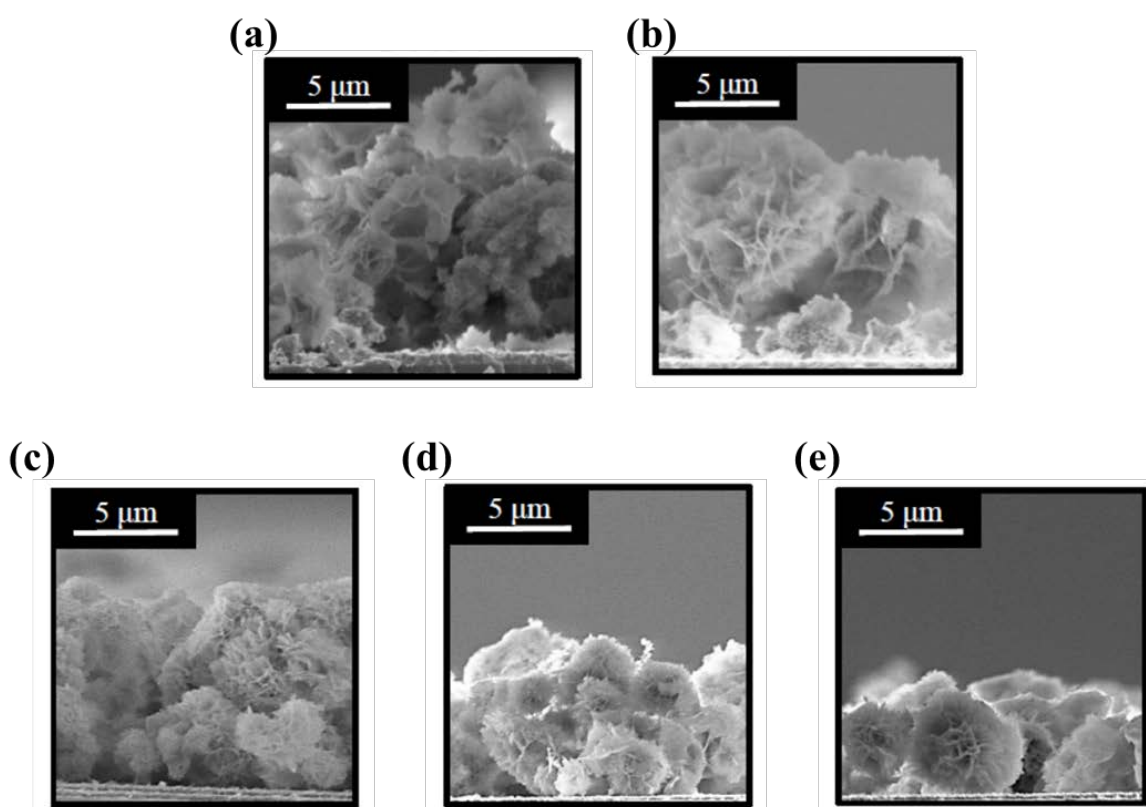

**Figure S4.** FE-SEM images of cross section of (a) P-NiO-1, (b) P-NiO-0.75 (c) P-NiO-0.5, (d) P-NiO-0.25, and (e) P-NiO-0.1.

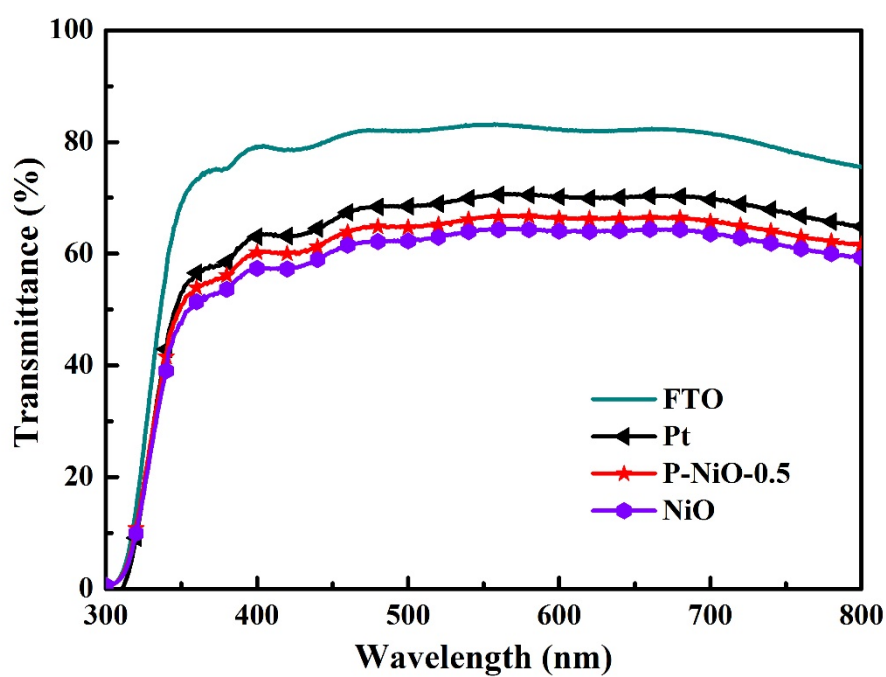

**Figure S5.** Transmittance spectra of various films.
